# Supplementary material
Source: Springer Nature journal article supplement (https://www.springermedizin.de/resource/supplementary/12889_2013_7502_MOESM1_ESM.pdf/9497914)

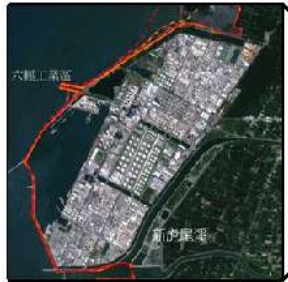

AREA : 1290.835 KM<sup>2</sup>

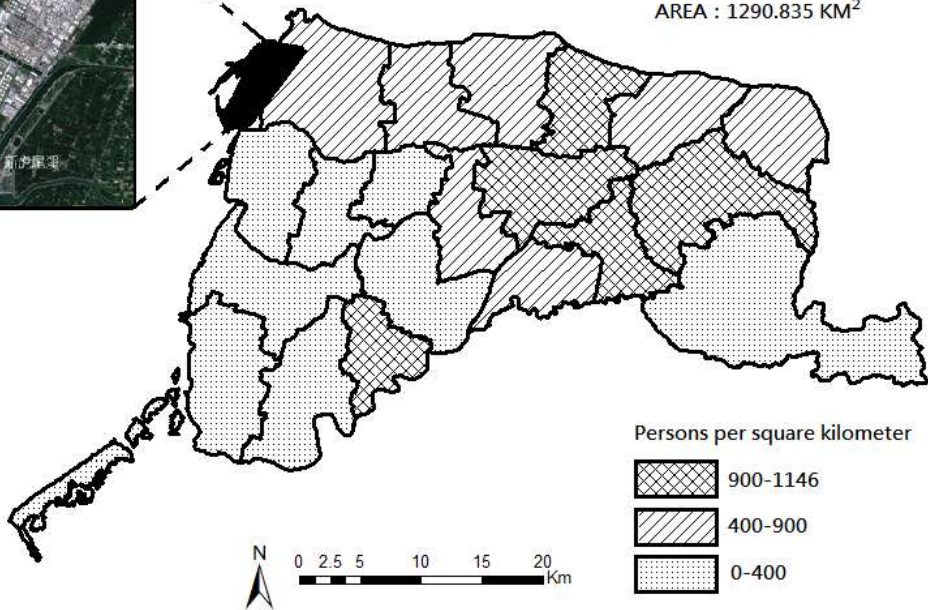

Supplement: MOESM1 [file 9497914]
